# Supplementary material
Source: PubMed Central journal article supplement (PMC2862166)
Supplement: NIHMS181082-supplement-Supp1.pdf [file NIHMS181082-supplement-Supp1.pdf]

**ONLINE SUPPLEMENT:**

**Additional Analyses for the Study "Incremental Predictive Value of Adding Past Blood Pressure Measurements to the Framingham Hypertension Risk Equation: the Whitehall II Study " by Mika Kivimäki, Adam G. Tabak, G. David Batty, Jane E. Ferrie, Hermann Nabi, Michael G. Marmot, Daniel R. Witte, Archana Singh-Manoux, Martin J. Shipley**

From the Department of Epidemiology and Public Health, UCL, London, UK; Finnish Institute of Occupational Health and University of Helsinki, Helsinki, Finland; Semmelweis University Faculty of Medicine, 1st Department of Medicine, Budapest, Hungary; Medical Research Council Social & Public Health Sciences Unit, Glasgow, UK; INSERM, AP-HP, Paris, France.

**Corresponding Author:** Prof. Mika Kivimäki, Department of Epidemiology and Public Health, University College London, 1-19 Torrington Place, WC1E 6BT London, United Kingdom. Tel: +44 207 679 8260, Fax +44 20 7419 6732 (m.kivimaki@ucl.ac.uk).

**Table S1. Stepwise Multivariable-adjusted Weibull Estimates and Hazard Ratios for Incident Hypertension in the Derivation Cohort for the Repeat Measures Risk Prediction Score (614 Incident Hypertension Cases among 4135 Person-examination Observations)**

| Parameter/predictor                                 | Weibull $\beta$ -coefficient ( $\pm$ SE) | Hazard ratio (95% CI)    | P value |
|-----------------------------------------------------|------------------------------------------|--------------------------|---------|
| Intercept                                           | 14.6705 $\pm$ 0.7072                     |                          |         |
| Age* (per year)                                     | -0.0266 $\pm$ 0.0046                     | 1.046 (1.030 – 1.062)    | <0.0001 |
| Women (vs men)                                      | -0.2197 $\pm$ 0.0540                     | 1.447 (1.211 – 1.729)    | <0.0001 |
| Systolic blood pressure (per 1 mm Hg)               | -0.0408 $\pm$ 0.0035                     | 1.071 (1.059 – 1.084)    | <0.0001 |
| Previous systolic blood pressure (per 1 mm Hg)      | -0.0166 $\pm$ 0.0033                     | 1.028 (1.017 – 1.039)    | <0.0001 |
| Diastolic blood pressure <sup>†</sup> (per 1 mm Hg) | -0.0155 $\pm$ 0.0050                     | 1.026 (1.010 – 1.043)    | 0.002   |
| Previous diastolic blood pressure (per 1 mm Hg)     | -0.0209 $\pm$ 0.0045                     | 1.036 (1.021 – 1.051)    | <0.0001 |
| Current smoking (vs not)                            | -0.1217 $\pm$ 0.0780                     | 1.227 (0.949 – 1.587)    | 0.12    |
| Parental hypertension (vs not)                      | -0.1748 $\pm$ 0.0494                     | 1.341 (1.140 – 1.579)    | 0.0004  |
| Body mass index (per unit)                          | -0.0264 $\pm$ 0.0066                     | 1.045 (1.023 – 1.068)    | <0.0001 |
| Age by diastolic blood pressure <sup>‡</sup>        | 0.0018 $\pm$ 0.0005                      | 0.9970 (0.9953 – 0.9987) | 0.0004  |
| Scale parameter                                     | 0.5947 $\pm$ 0.0222                      |                          | NA      |
| Weibull shape                                       | 1.6815 $\pm$ 0.0629                      |                          | NA      |

\* Main effect of age is given for a diastolic blood pressure of 75 mm Hg.

<sup>†</sup> Main effect of diastolic blood pressure is given for an age of 50 years.

<sup>‡</sup> The effect of increasing diastolic blood pressure on the incidence of hypertension decreases with age.

**Table S2. Stepwise Multivariable-adjusted Weibull Estimates and Hazard Ratios for Incident Hypertension in the Participants of the First Screening Cycle Only (573 Incident Hypertension Cases among 4141 Person-examination Observations)**

| Parameter/predictor                                 | Weibull $\beta$ -coefficient ( $\pm$ SE) | Hazard ratio (95% CI)    | P value |
|-----------------------------------------------------|------------------------------------------|--------------------------|---------|
| Intercept                                           | 14.9377 $\pm$ 0.7520                     |                          |         |
| Age* (per year)                                     | -0.0373 $\pm$ 0.0061                     | 1.064 (1.043 – 1.085)    | <0.0001 |
| Women (vs men)                                      | -0.1986 $\pm$ 0.0570                     | 1.391 (1.155 – 1.675)    | 0.0005  |
| Systolic blood pressure (per 1 mm Hg)               | -0.0357 $\pm$ 0.0038                     | 1.061 (1.048 – 1.075)    | <0.0001 |
| Previous systolic blood pressure (per 1 mm Hg)      | -0.0144 $\pm$ 0.0035                     | 1.024 (1.013 – 1.036)    | <0.0001 |
| Diastolic blood pressure <sup>†</sup> (per 1 mm Hg) | -0.0221 $\pm$ 0.0056                     | 1.037 (1.019 – 1.057)    | <0.0001 |
| Previous diastolic blood pressure (per 1 mm Hg)     | -0.0204 $\pm$ 0.0046                     | 1.035 (1.019 – 1.050)    | <0.0001 |
| Current smoking (vs not)                            | -0.1249 $\pm$ 0.0768                     | 1.231 (0.958 – 1.581)    | 0.10    |
| Parental hypertension (vs not)                      | -0.1667 $\pm$ 0.0515                     | 1.319 (1.115 – 1.561)    | 0.0012  |
| Body mass index (per unit)                          | -0.0306 $\pm$ 0.0068                     | 1.052 (1.029 – 1.076)    | <0.0001 |
| Age by diastolic blood pressure <sup>‡</sup>        | 0.0028 $\pm$ 0.0007                      | 0.9954 (0.9930 – 0.9977) | <0.0001 |
| Scale parameter                                     | 0.6016 $\pm$ 0.0234                      |                          | NA      |
| Weibull shape                                       | 1.6623 $\pm$ 0.0648                      |                          | NA      |

\* Main effect of age is given for a diastolic blood pressure of 75 mm Hg.

<sup>†</sup> Main effect of diastolic blood pressure is given for an age of 50 years.

<sup>‡</sup> The effect of increasing diastolic blood pressure on the incidence of hypertension decreases with age.

**Table S3. Stepwise Multivariable-adjusted Weibull Estimates and Hazard Ratios for Incident Hypertension in the Derivation Cohort for the Average Blood Pressure Risk Prediction Score (614 Incident Hypertension Cases among 4135 Person-examination Observations)**

| Parameter/predictor                               | Weibull $\beta$ -coefficient ( $\pm$ SE) | Hazard ratio (95% CI)    | P value |
|---------------------------------------------------|------------------------------------------|--------------------------|---------|
| Intercept                                         | 15.2711 $\pm$ 0.7414                     |                          |         |
| Age* (per year)                                   | -0.0328 $\pm$ 0.0047                     | 1.056 (1.040 – 1.073)    | <0.0001 |
| Women (vs men)                                    | -0.2247 $\pm$ 0.0543                     | 1.456 (1.218 – 1.739)    | <0.0001 |
| Average systolic blood pressure (per 1 mm Hg) †   | -0.0580 $\pm$ 0.0043                     | 1.102 (1.086 – 1.117)    | <0.0001 |
| Average diastolic blood pressure† (per 1 mm Hg) † | -0.0379 $\pm$ 0.0061                     | 1.065 (1.044 – 1.087)    | <0.0001 |
| Current smoking (vs not)                          | -0.1065 $\pm$ 0.0786                     | 1.195 (0.924 – 1.557)    | 0.18    |
| Parental hypertension (vs not)                    | -0.1817 $\pm$ 0.0497                     | 1.355 (1.151 – 1.594)    | 0.0003  |
| Body mass index (per unit)                        | -0.0297 $\pm$ 0.0066                     | 1.051 (1.028 – 1.074)    | <0.0001 |
| Age by usual diastolic blood pressure‡            | 0.0025 $\pm$ 0.0007                      | 0.9958 (0.9935 – 0.9980) | 0.0002  |
| Scale parameter                                   | 0.5984 $\pm$ 0.0224                      |                          | NA      |
| Weibull shape                                     | 1.6710 $\pm$ 0.0626                      |                          | NA      |

\* Main effect of age is given for a diastolic blood pressure of 75 mm Hg.

† The average of current and previous blood pressure.

‡ The effect of increasing diastolic blood pressure on the incidence of hypertension decreases with age.

**Table S4. Stepwise Multivariable-adjusted Weibull Estimates and Hazard Ratios for Incident Hypertension in the Derivation Cohort for the 'Usual' Blood Pressure + Current Blood Pressure Risk Prediction Score (614 Incident Hypertension Cases among 4135 Person-examination Observations)**

| Parameter/predictor                                         | Weibull $\beta$ -coefficient ( $\pm$ SE) | Hazard ratio (95% CI)    | P value |
|-------------------------------------------------------------|------------------------------------------|--------------------------|---------|
| Intercept                                                   | 18.6112 $\pm$ 1.0039                     |                          |         |
| Age* (per year)                                             | -0.0266 $\pm$ 0.0046                     | 1.046 (1.030 – 1.062)    | <0.0001 |
| Women (vs men)                                              | -0.2197 $\pm$ 0.0540                     | 1.447 (1.211 – 1.729)    | 0.0005  |
| Current systolic blood pressure (per 1 mm Hg)               | -0.0408 $\pm$ 0.0035                     | 1.071 (1.059 – 1.084)    | <0.0001 |
| Usual systolic blood pressure (per 1 mm Hg)                 | -0.0318 $\pm$ 0.0063                     | 1.055 (1.033 – 1.077)    | <0.0001 |
| Current diastolic blood pressure <sup>†</sup> (per 1 mm Hg) | -0.0155 $\pm$ 0.0050                     | 1.026 (1.010 – 1.043)    | 0.0019  |
| Usual diastolic blood pressure (per 1 mm Hg)                | -0.0501 $\pm$ 0.0108                     | 1.088 (1.050 – 1.127)    | <0.0001 |
| Current smoking (vs not)                                    | -0.1217 $\pm$ 0.0780                     | 1.227 (0.949 – 1.587)    | 0.12    |
| Parental hypertension (vs not)                              | -0.1748 $\pm$ 0.0494                     | 1.342 (1.140 – 1.579)    | 0.0004  |
| Body mass index (per unit)                                  | -0.0264 $\pm$ 0.0066                     | 1.045 (1.022 – 1.068)    | <0.0001 |
| Age by current diastolic blood pressure <sup>‡</sup>        | 0.0018 $\pm$ 0.0005                      | 0.9970 (0.9953 – 0.9987) | 0.0004  |
| Scale parameter                                             | 0.5947 $\pm$ 0.0222                      |                          | NA      |
| Weibull shape                                               | 1.6815 $\pm$ 0.0629                      |                          | NA      |

\* Main effect of age is given for a current diastolic blood pressure of 75 mm Hg.

<sup>†</sup> Main effect of current diastolic blood pressure is given for an age of 50 years.

<sup>‡</sup> The effect of increasing current diastolic blood pressure on the incidence of hypertension decreases with age.

**Table S5. Reclassification of the Predicted Risk of Incident Hypertension, Based on the Framingham, Repeat Measures, Average and Usual Blood Pressure Risk Prediction Scores in the Validation Cohort (2785 Observations).**

| Reclassification                                            | Reclassified*  |                | Net correctly reclassified, % |
|-------------------------------------------------------------|----------------|----------------|-------------------------------|
|                                                             | Increased risk | Decreased risk |                               |
| <b>Framingham → Average Blood Pressure score</b>            |                |                |                               |
| Hypertensive (N=438)                                        | 44             | 84             | -9.1%                         |
| Non-hypertensive (N=2347)                                   | 268            | 618            | 14.9%                         |
| Net Reclassification Improvement (95% CI)                   |                |                | 5.8% (0.1 to 11.4)            |
| <b>Repeat Measures Score → Average Blood Pressure score</b> |                |                |                               |
| Hypertensive (N=438)                                        | 20             | 31             | -9.1%                         |
| Non-hypertensive (N=2347)                                   | 169            | 147            | -0.9%                         |
| Net Reclassification Improvement (95% CI)                   |                |                | -3.4% (-7.0 to 0.1)           |
| <b>Framingham → 'Usual' + Current Blood Pressure score</b>  |                |                |                               |
| Hypertensive (N=438)                                        | 34             | 68             | -7.8%                         |
| Non-hypertensive (N=2347)                                   | 183            | 584            | 17.1%                         |
| Net Reclassification Improvement (95% CI)                   |                |                | 9.3% (4.2 to 14.4)            |

\*Based on four predicted risk categories: <5%, 5%-10%, 11%-20% and >20%.
